# Supplementary material
Source: PubMed Central journal article supplement (PMC4348789)
Supplement: supp_pp.114.256081_256081Supplemental_Data_Files.pdf [file supp_pp.114.256081_256081Supplemental_Data_Files.pdf]

## Supplemental Data Files

### Supplemental Figures

Supplemental Figure 1. *mut5* is unable to SUMOylate stress-related proteins during prolonged heat stress at 42°C.

Supplemental Figure 2. Amino acid sequence alignments comparing verified *Saccharomyces cerevisiae* SUMO and ubiquitin E2 conjugases with putative SUMO and ubiquitin E2 conjugases from *C. reinhardtii*.

Supplemental Figure 3. Comparison of CrUBC9 and CrUBC3 mRNA levels in wild-type cells in response to heat shock.

Supplemental Figure 4. *mut5* fails to SUMOylate high molecular weight in response to diverse abiotic stresses.

Supplemental Figure 5. *mut5* fails to SUMOylate high molecular weight protein in response to carbon-source deprivation.

Supplemental Figure 6. Phenotypes of *mut5* under osmotic and salt stresses.

Supplemental Figure 7. Phenotypes of complemented *mut5*.

Supplemental Figure 8. Complementation of *mut5* with a CrUBC9-4XEAAAR-mCherry fusion

Supplemental Figure 9. CrUBC9 localizes to the nucleus at 25°C and 42°C

Supplemental Table 1. Identification of the closet orthologs to SUMO E2 conjugases and ubiquitin E2 conjugases in *S. cerevisiae* and *C. reinhardtii*.

Supplemental Table 2. Annotation of protein sequences used for generation of phylogenetic tree.

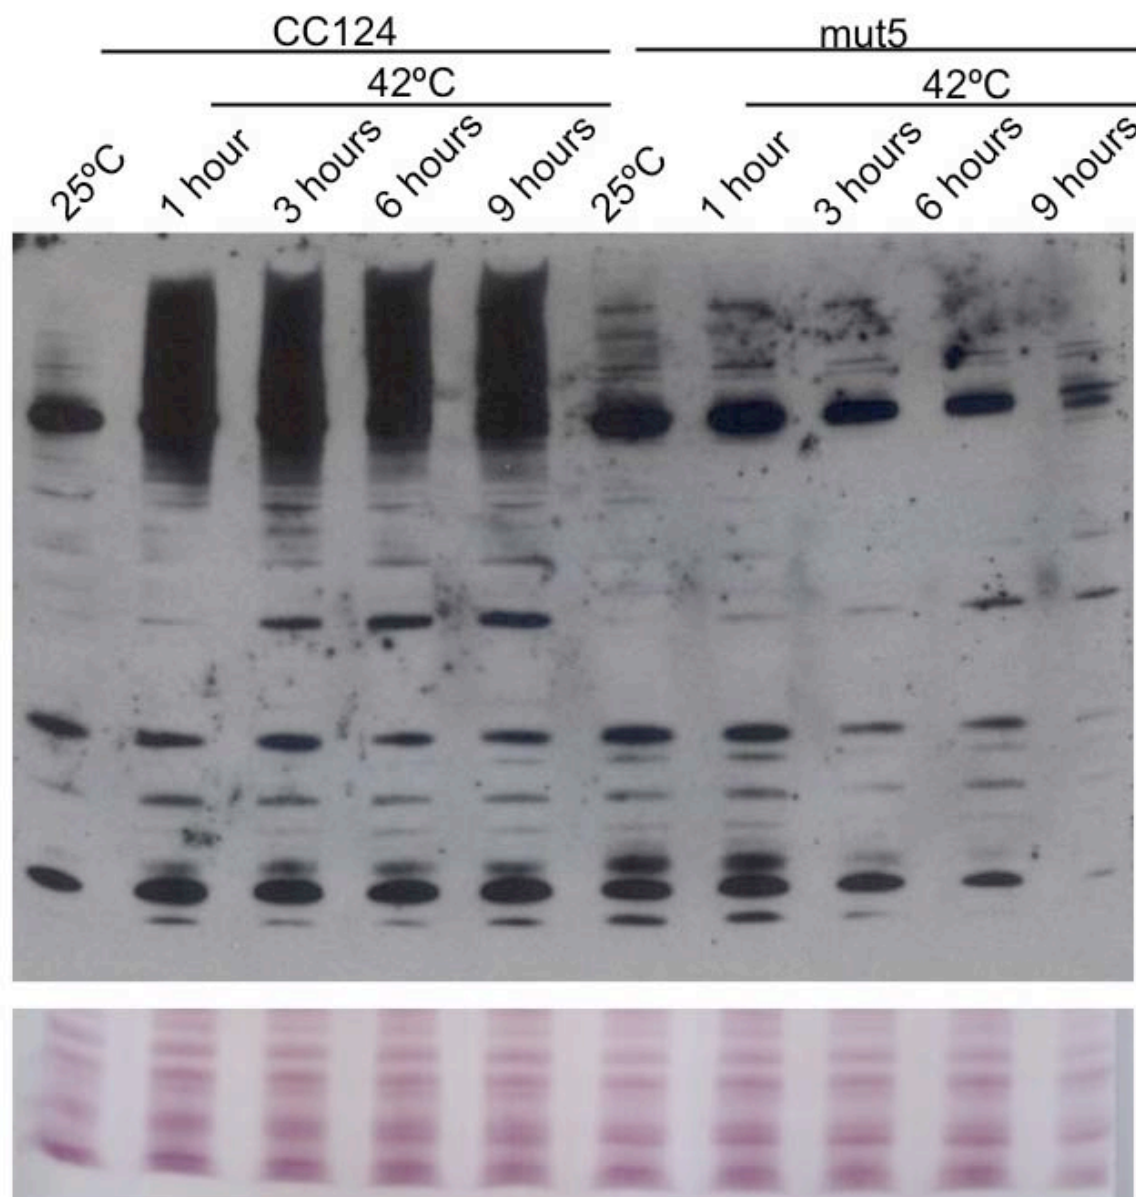

**Supplemental Figure 1. *mut5* is unable to SUMOylate stress-related proteins during prolonged heat stress at 42°C.** Whole cell extracts were prepared from wild-type and *mut5* cultures grown at 25°C (lanes 1 and 6) and after shifting cultures to 42°C for one, three, six and nine hours. Whole cell extracts were isolated after one, three, six, and nine hours at 42°C. Upper panel is an immunoblot using anti-SUMO antibodies, lower panel is a Reactive Brown stain of the blot showing equivalent loading of proteins into each lane.

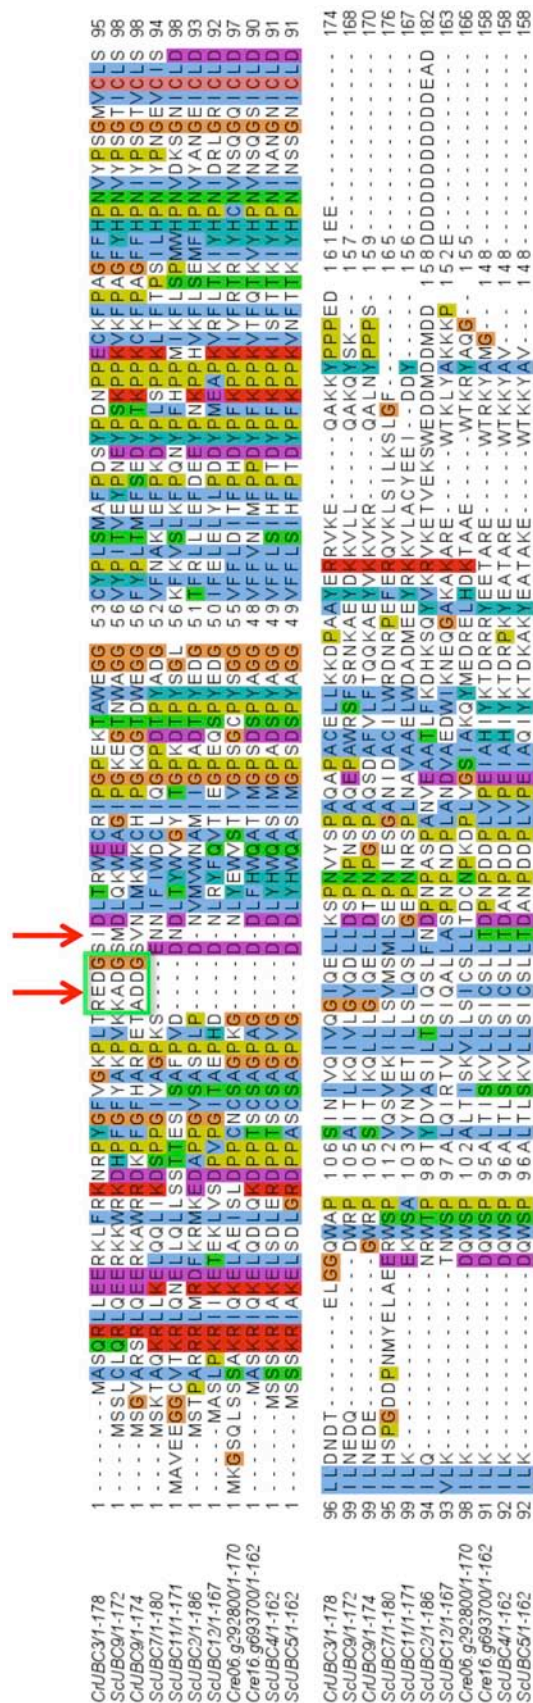

**Supplemental Figure 2. Amino acid sequence alignments comparing verified *Saccharomyces cerevisiae* SUMO and ubiquitin E2 conjugases with putative SUMO and ubiquitin E2 conjugases from *C. reinhardtii*.** Alignment shows the CrUBC9 as well as three additional previously identified SUMO conjugase candidates (CrUBC3, Cre06.g292800, Cre16.g693700) aligned with yeast SUMO conjugase (ScUBC9) as well as known yeast ubiquitin conjugase enzymes (ScUBC2, ScUBC4, ScUBC5, ScUBC7, ScUBC11, ScUBC12). The amino acids that correspond to a five amino acid insertion noted on the human and mouse UBC9 proteins are indicated between the two arrows in the alignment. The green box contains a four amino acid insert present in SUMO E2 conjugases and absent from ubiquitin E2 conjugases.

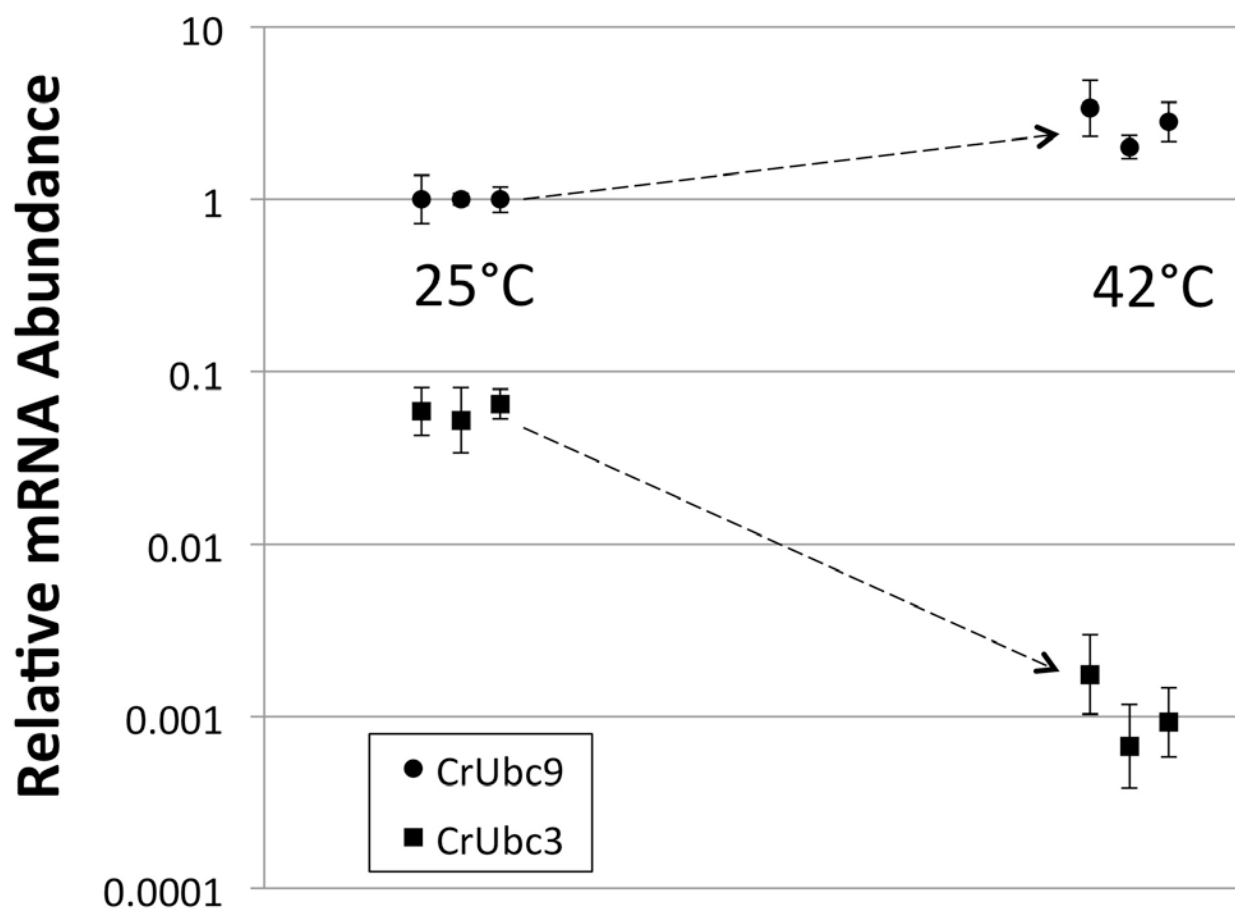

**Supplemental Figure 3. Comparison of *CrUbc9* and *CrUbc3* mRNA levels in wild-type cells in response to heat shock.** RNA was isolated from wild-type *C. reinhardtii* cells before and after a heat stress at 42°, and the transcript abundance was calculated relative to *CrUbc9* mRNA levels at 25°C. Individual data points reflect separate biological replicates and vertical bars represent the range of mRNA abundance levels possible based on the standard deviation for technical triplicates at each data point.

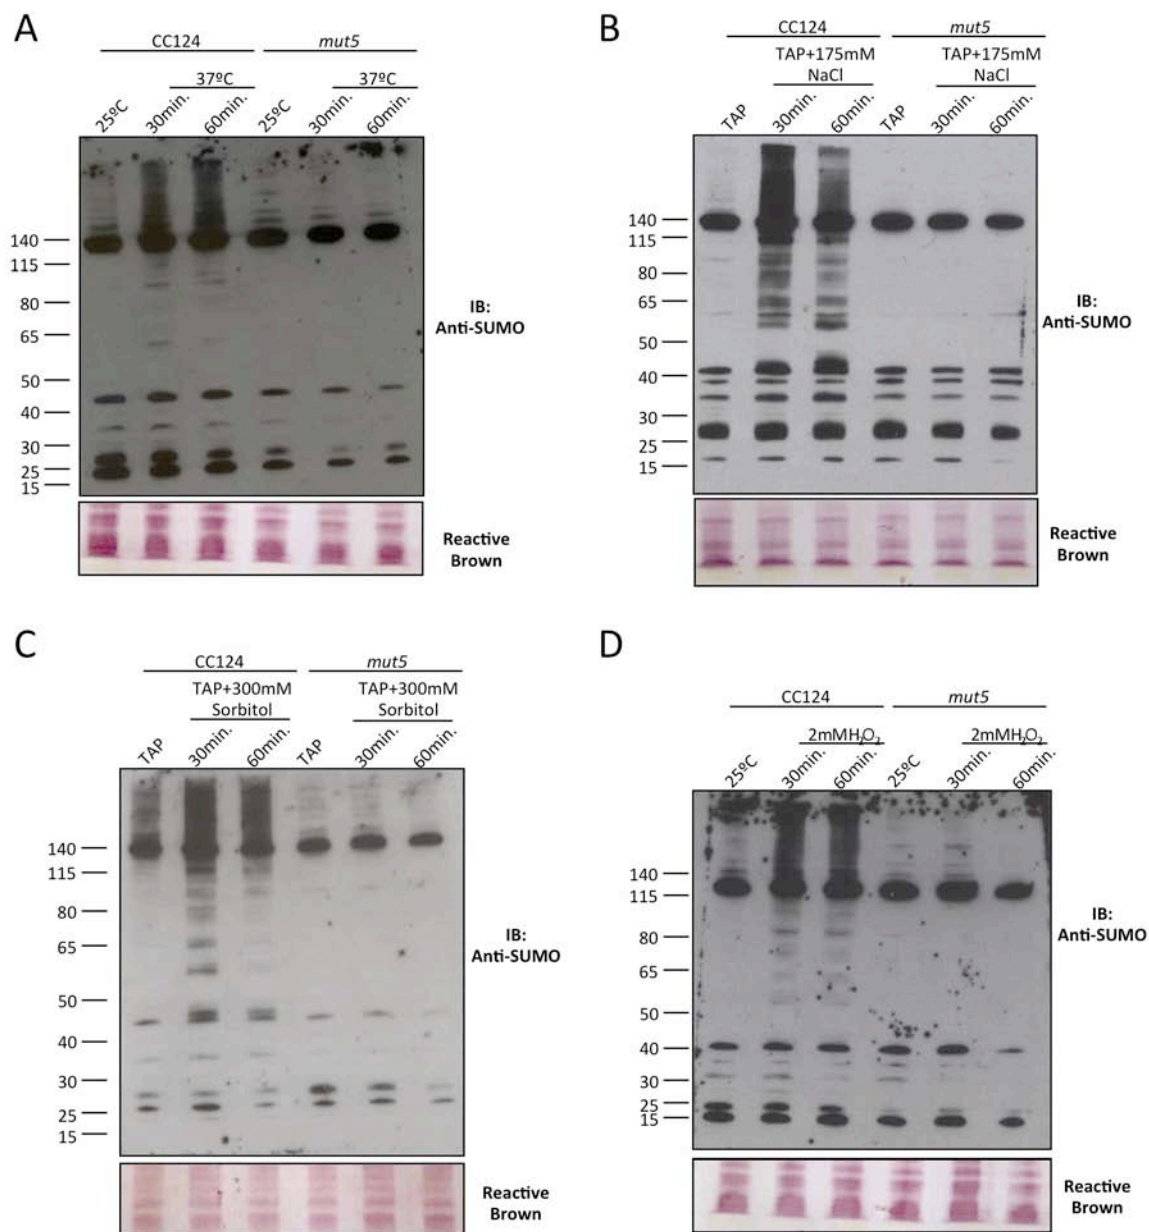

**Supplemental Figure 4. *mut5* fails to SUMOylate high molecular weight in response to diverse abiotic stresses.** Immunoblot analysis of wild-type and *mut5* cells after exposure to (A) 37°C, (B) 175 mM NaCl, (C) 300 mM sorbitol, (D) 2 mM H<sub>2</sub>O<sub>2</sub>. Whole cell extracts were prepared from cells grown in TAP at 25°C, and then at 30 minutes and 60 minutes after the start of each stress treatment. Extracts from equal numbers of cells were loaded in each lane and Reactive Brown staining was used to verify similar loading between lanes (lower panel).



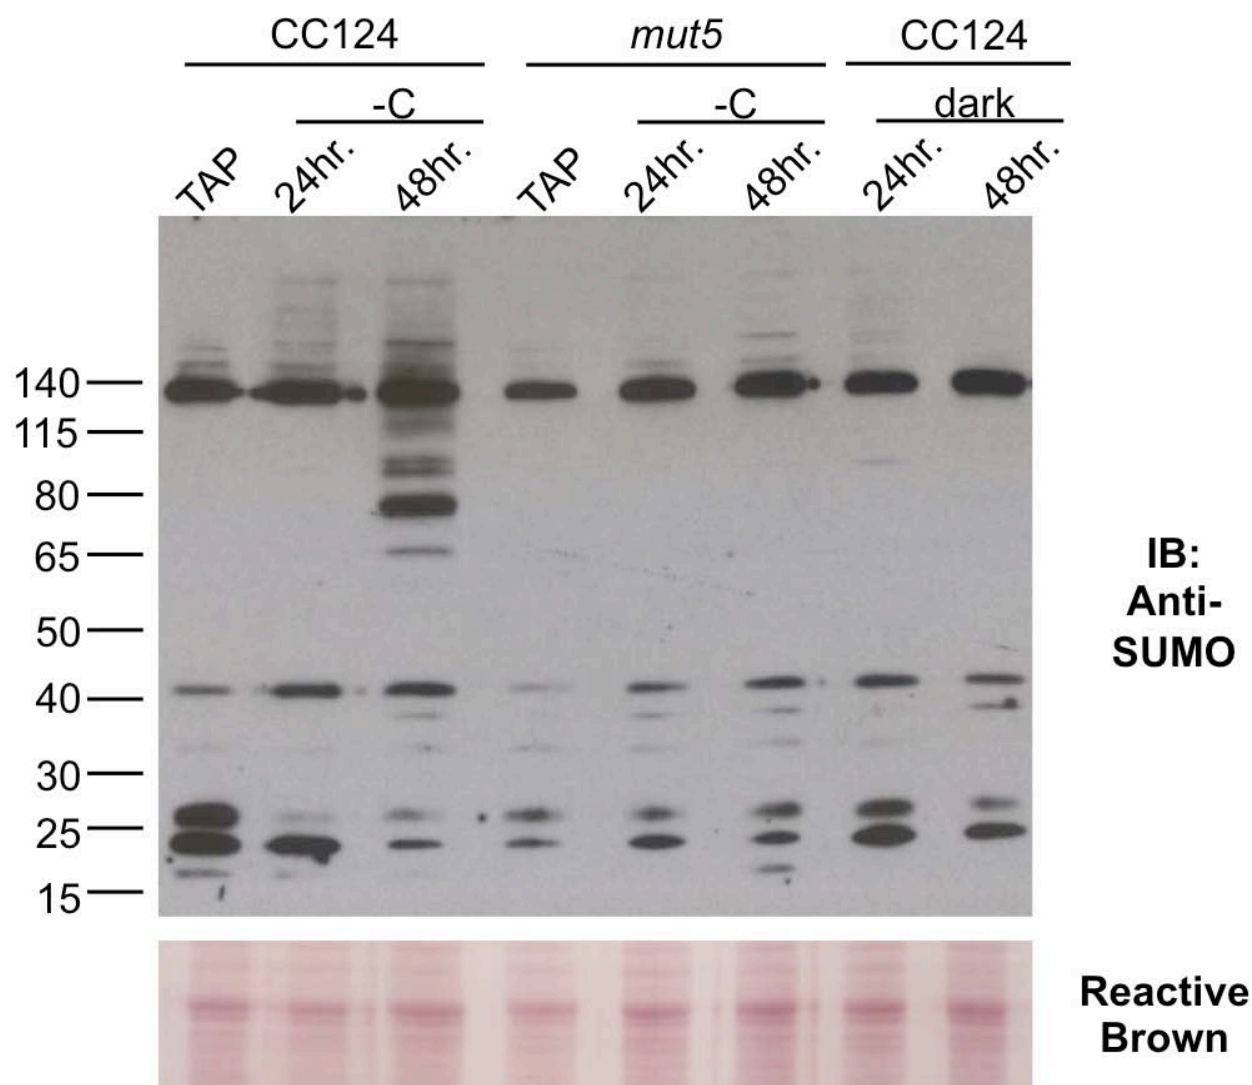

**Supplemental Figure 5. *mut5* fails to SUMOylate high molecular weight proteins in response to carbon-source deprivation.** Wild-type and *mut5* cultures were washed twice in water, resuspended in TAP media with 8.7mM acetate instead of the usual 17.4mM acetate, and incubated in the dark to slowly deprive them of a carbon source. Whole cell extracts were prepared after 24 and 48 hours of carbon deprivation. Control wild-type cells were incubated in full strength TAP medium (17.4mM acetate) in the light (first lane) and in the dark (last two lanes). Equivalent numbers of cells were added to each lane of a bis-Tris SDS polyacrylamide gel. Reactive Brown stain of the protein blot demonstrated similar loading between lanes (lower panel).

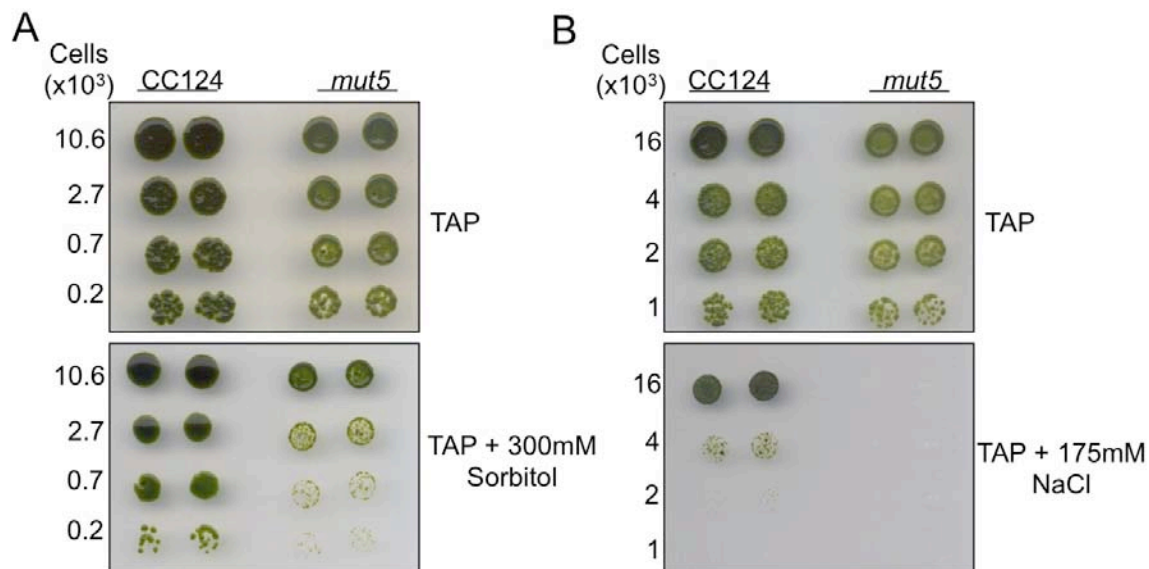

**Supplemental Figure 6. Phenotypes of *mut5* under osmotic and salt stresses.** (A) Wild-type and *mut5* cultures were diluted spotted in a 1:4 dilution series on TAP and TAP+300mM sorbitol plates. Plates were incubated at 25°C to assess growth. (B) Wild-type and *mut5* cultures were diluted in a 1:4 dilution series and spotted on TAP and TAP+175mM NaCl plates. Plates were incubated at 25°C to assess growth.

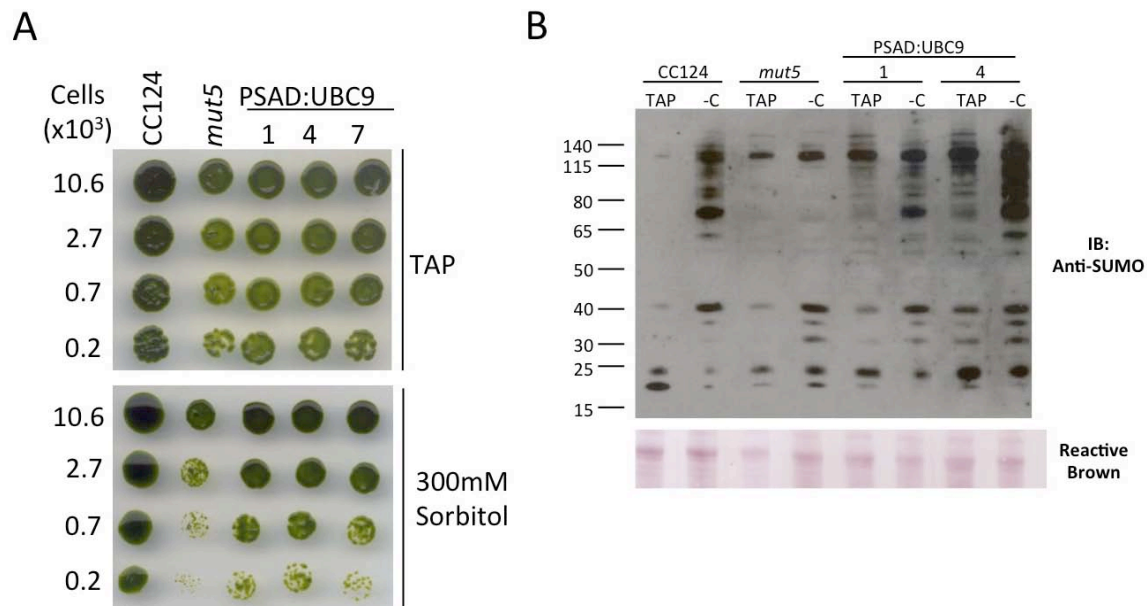

**Supplemental Figure 7. Phenotypes of complemented *mut5*.** (A) Normalized cell cultures were spotted in a 1:4 dilution series on TAP and TAP+300mM sorbitol plates to assess growth under osmotic stress. (B) Cultures were shifted to TAP + 8.7mM acetate for 48 hours and whole cell extracts were analyzed by immunoblot analysis with anti-SUMO antibodies. Reactive Brown stain (lower panel) shows similar loading per lane.



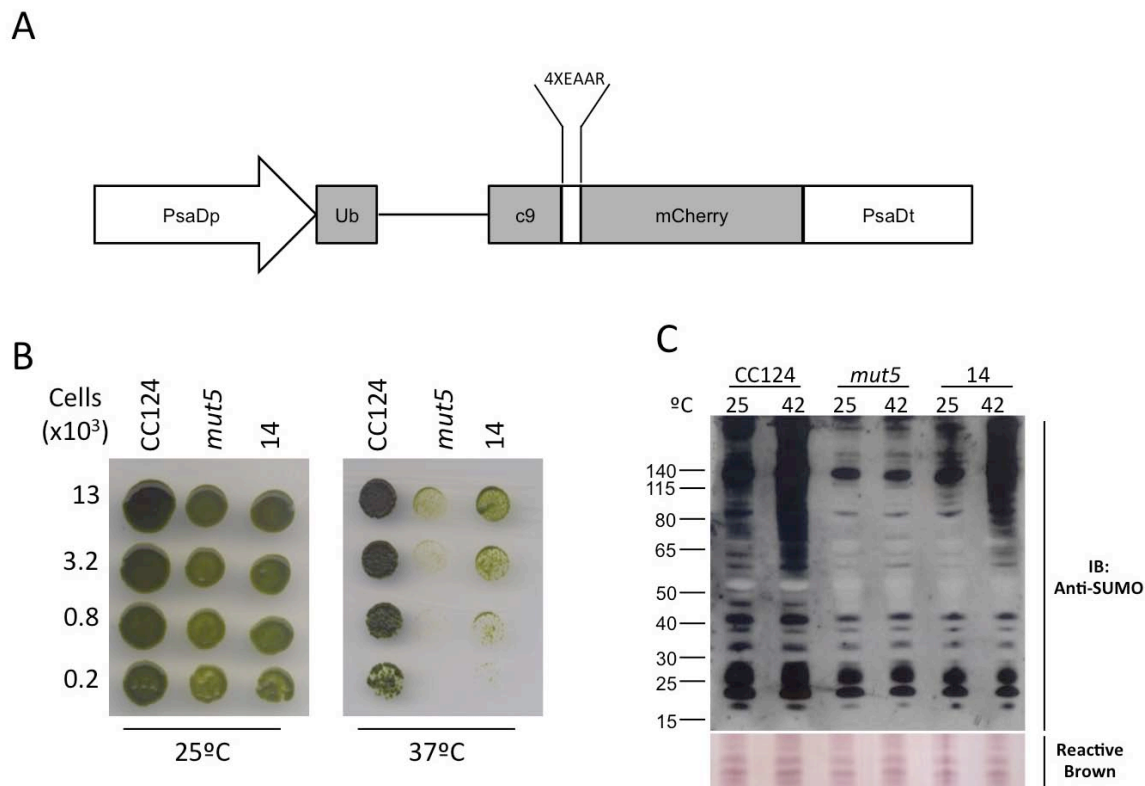

**Supplemental Figure 8. Complementation of *mut5* with a CrUbc9-4XEAAAR-mCherry fusion** (A) Diagram of the CrUbc9-4XEAAAR-mCherry expression cassette. The thin line indicates the second intron of *CrUbc9*. (B) Growth at 37°C of line #14 complemented with Ubc9-4XEAAAR-mCherry fusion. Normalized cell cultures were spotted on two identical TAP plates, one of which was incubated at 37°C for three days, the other at 25°C. (C) SUMOylation patterns of wild-type cells, *mut5* and the *mut5* CrUbc9-4XEAAAR-mCherry transformant #14 grown at 25°C and under heat stress at 42°C for one hour. Whole cell extracts were analyzed by immunoblot with anti-SUMO antibodies (upper panel). Reactive brown stain (lower panel) shows equivalent loading.

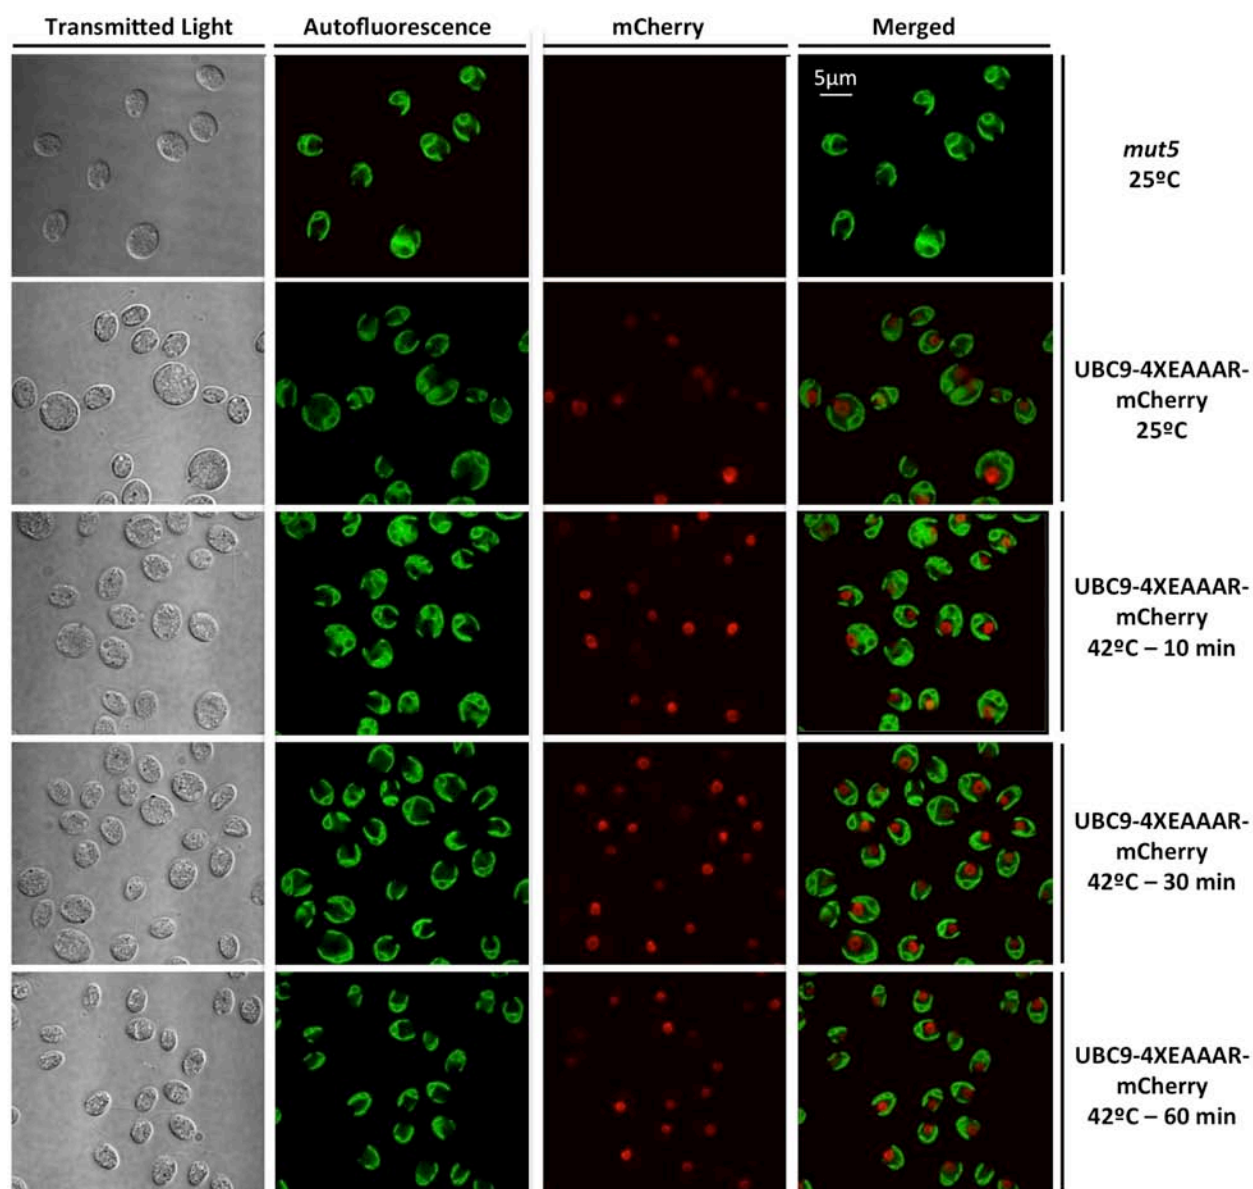

**Supplemental Figure 9. CrUBC9 localizes to the nucleus at 25°C and 42°C.** Fluorescence microscopy of *mut5* cells complemented with CrUBC9-4XEAAAR-mCherry and incubated at 25°C or 42°C. Line #14 was shifted to 42°C and samples analyzed by fluorescence microscopy after 10, 30 and 60 minutes at 42°C. Row 1 shows *mut5* cells that have not been complemented. Row 2 shows Line #14 cells prior to the shift to 42°C. Rows 3-5 show Line #14 cells at 10, 30, and 60 minutes after shifting to 42°C, respectively. Each row shows (from left to right) transmitted light, chloroplast autofluorescence (in false green color), mCherry fluorescence, and a merged image of the chloroplast and mCherry signals. Scale bar shown in the upper right panel; magnification is the same for all panels shown.

| <b>Candidate <i>C. reinhardtii</i><br/>SUMO Conjugase Proteins</b> | <b>Ortholog in<br/><i>S. cerevisiae</i></b> | <b>Percent Identity</b> |
|--------------------------------------------------------------------|---------------------------------------------|-------------------------|
| CrUBC9                                                             | ScUBC9                                      | 61.78%                  |
| CrUBC3                                                             | ScUBC9                                      | 52.60%                  |
| Cre16.g693700                                                      | ScUBC4/ScUBC5                               | 66.89%                  |
| Cre06.g292800                                                      | ScUBC4                                      | 80.27%                  |

**Supplemental Table 1. Identification of the closet orthologs to SUMO E2 conjugases and ubiquitin E2 conjugases in *S. cerevisiae* and *C. reinhardtii*.** Comparison of candidate SUMO conjugase proteins with yeast SUMO conjugase and ubiquitin conjugase enzymes demonstrates that CrUBC9 and CrUBC3 are the closest orthologs to ScUBC9.

| <b>Symbol</b> | <b>Accession #</b> | <b>Organism</b>             | <b>E2 Conjugase for:</b> | <b>Reference</b> |
|---------------|--------------------|-----------------------------|--------------------------|------------------|
| AtUFC1        | Q9SXC8             | <i>Arabidopsis thaliana</i> | UFM1                     |                  |

|            |              |                                  |                  |    |
|------------|--------------|----------------------------------|------------------|----|
| HsUFC1     | NP_057490    | <i>Homo sapiens</i>              | <b>UFM1</b>      | 1  |
| ScUBC12    | P52491       | <i>Saccharomyces cerevisiae</i>  | <b>RUB1</b>      | 2  |
| AtRCE1     | Q9SDY5       | <i>Arabidopsis thaliana</i>      | <b>RUB1</b>      | 3  |
| HsUBC12    | NP_003960    | <i>Homo sapiens</i>              | <b>NEDD8</b>     | 4  |
| SpHUS5     | P40984       | <i>Schizosaccharomyces pombe</i> | <b>SUMO</b>      | 5  |
| DdUBC9     | Q9NGP4       | <i>Dictyostelium discoideum</i>  | SUMO             |    |
| AtSCE1     | Q42551       | <i>Arabidopsis thaliana</i>      | <b>SUMO</b>      | 6  |
| PmUBC9     | Q6Y1Z4       | <i>Pagrus major</i>              | SUMO             |    |
| DrUBC9B    | Q9DDJ0       | <i>Danio rerio</i>               | SUMO             |    |
| MaUBC9     | O09181       | <i>Mesocricetus auratus</i>      | SUMO             |    |
| CeUBC9     | Q95017       | <i>Caenorhabditis elegans</i>    | SUMO             |    |
| DrUBC9A    | Q9W6H5       | <i>Danio rerio</i>               | <b>SUMO</b>      | 7  |
| HsUBC9     | P63279       | <i>Homo sapiens</i>              | <b>SUMO</b>      | 8  |
| RnUBC9     | P63281       | <i>Rattus norvegicus</i>         | SUMO             |    |
| ScUBC9     | P50623       | <i>Saccharomyces cerevisiae</i>  | <b>SUMO</b>      | 9  |
| CrUBC9     | XP_001694849 | <i>Chlamydomonas reinhardtii</i> | <b>SUMO</b>      | 10 |
| CrUBC3     | XP_001703521 | <i>Chlamydomonas reinhardtii</i> |                  |    |
| HsUBCH5    | P51668       | <i>Homo sapiens</i>              | <b>Ubiquitin</b> | 11 |
| SpUBC4     | P46595       | <i>Schizosaccharomyces pombe</i> | Ubiquitin        |    |
| ScUBC4     | P15731       | <i>Saccharomyces cerevisiae</i>  | <b>Ubiquitin</b> | 12 |
| ScUBC5     | P15732       | <i>Saccharomyces cerevisiae</i>  | <b>Ubiquitin</b> | 12 |
| AtUBC3     | Q9FKT3       | <i>Arabidopsis thaliana</i>      | <b>Ubiquitin</b> | 13 |
| Cre16.g693 | XP_001699308 | <i>Chlamydomonas reinhardtii</i> |                  |    |
| Cre06.g292 | XP_001701577 | <i>Chlamydomonas reinhardtii</i> |                  |    |
| MmUB2E2    | Q91W82       | <i>Mus musculus</i>              | Ubiquitin        |    |
| DmUBCD2    | P52485       | <i>Drosophila melanogaster</i>   | <b>Ubiquitin</b> | 14 |
| HsUBCH6    | P51965       | <i>Homo sapiens</i>              | <b>Ubiquitin</b> | 15 |
| MmUBCM3    | P52482       | <i>Mus musculus</i>              | <b>Ubiquitin</b> | 14 |
| HsUBCH9    | Q969T4       | <i>Homo sapiens</i>              | <b>Ubiquitin</b> | 16 |
| HsUBCH8    | Q96LR5       | <i>Homo sapiens</i>              | <b>Ubiquitin</b> | 17 |
| OsUBC5A    | Q8S920       | <i>Oryza sativa</i>              | <b>Ubiquitin</b> | 18 |
| OsUBC5B    | Q8S919       | <i>Oryza sativa</i>              | <b>Ubiquitin</b> | 18 |
| AtUBC28    | Q94F47       | <i>Arabidopsis thaliana</i>      | <b>Ubiquitin</b> | 13 |
| SIUBC4     | P35135       | <i>Solanum lycopersicum</i>      | Ubiquitin        |    |
| AtUBC11    | P35134       | <i>Arabidopsis thaliana</i>      | <b>Ubiquitin</b> | 13 |
| AtUBC9     | P35132       | <i>Arabidopsis thaliana</i>      | <b>Ubiquitin</b> | 19 |
| AtUBC8     | P35131       | <i>Arabidopsis thaliana</i>      | <b>Ubiquitin</b> | 20 |
| AtUBC10    | P35133       | <i>Arabidopsis thaliana</i>      | <b>Ubiquitin</b> | 13 |
| AtUBC1     | P25865       | <i>Arabidopsis thaliana</i>      | <b>Ubiquitin</b> | 21 |
| ScUBC2     | P06104       | <i>Saccharomyces cerevisiae</i>  | <b>Ubiquitin</b> | 22 |
| HsUBE2A    | NP_003327    | <i>Homo sapiens</i>              | <b>Ubiquitin</b> | 23 |
| ScUBC11    | P52492       | <i>Saccharomyces cerevisiae</i>  | <b>Ubiquitin</b> |    |
| AtUBC19    | Q9LJZ5       | <i>Arabidopsis thaliana</i>      | Ubiquitin        |    |
| HsUBCH10   | O00762       | <i>Homo sapiens</i>              | <b>Ubiquitin</b> | 24 |
| ScUBC7     | Q02159       | <i>Saccharomyces cerevisiae</i>  | <b>Ubiquitin</b> | 25 |

**Supplemental Table 2. Annotation of protein sequences used for generation of phylogenetic tree.** The table above shows the symbol used to annotate each sequence in the phylogenetic tree, the corresponding accession number for that sequence in GenBank, and the organism from which the sequence was obtained. The fourth column shows the protein for which the sequence is an E2 conjugase. The post-translational modification for enzymes for which E2 conjugase activity has been verified experimentally are underlined and bolded, and the reference for that verification can be found in the last column. References are listed below:

### Supplementary Data References

- <sup>1</sup>**Komatsu MK, Chiba T, Tatsumi K, Shun-ichiro I, Tanida I, Okazaki N, Ueno T, Kominami E, Natsume T, Tanaka K** (2004) A novel protein-conjugating system for Ufm1, a ubiquitin-fold modifier. *EMBO J* **23**: 1977-1986
- <sup>2</sup>**Liakopoulos D, Doenges G, Matuschewski K, Jentsch S** (1998) A novel protein modification pathway related to the ubiquitin system. *EMBO J* **17**:2208-2214
- <sup>3</sup>**Dharmasiri S, Dharmasiri N, Hellmann H, Estelle M** (2003) The RUB/Nedd8 conjugation pathway is required for early development in *Arabidopsis*. *EMBO J* **22**:1762-1770
- <sup>4</sup>**Gong L, Yeh ET** (1999) Identification of the activating and conjugating enzymes of the NEDD8 conjugation pathway. *J Biol Chem* **274**: 12036-12042
- <sup>5</sup>**Ho JCY, Warr NH, Shimizu H, Watts FZ** (2001) SUMO modification of Rad22, the *Schizosaccharomyces pombe* homologue of the recombination protein Rad52. *Nucleic Acids Res* **29**: 4179-4186
- <sup>6</sup>**Saracco SA, Miller MJ, Kurepa J, Vierstra RD** (2007) Genetic analysis of SUMOylation in *Arabidopsis*: conjugation of SUMO1 and SUMO2 to nuclear proteins is essential. *Plant Physiol* **145**: 119-134
- <sup>7</sup>**Nowak M, Hammerschmidt M.** (2006) Ubc9 Regulates Mitosis and Cell Survival during Zebrafish Development. *Mol Biol Cell* **17**: 5324-5336

- <sup>8</sup>**Tatham MH, Jaffrah E., Vaughan OA, Desterro JM, Botting CH, Naismith JH, Hay RT** (2001) Polymeric chains of SUMO-2 and SUMO-3 are conjugated to protein substrates by SAE1/SAE2 and Ubc9. *J Biol Chem* **276**: 35368-35374
- <sup>9</sup>**Johnson ES, Blobel G** (1997) Ubc9p is the conjugating enzyme for the ubiquitin-like protein Smt3p. *J Biol Chem* **272**: 26799-26802
- <sup>10</sup>**Wang Y, Ladunga I, Miller AR, Horken KM, Plucinak T, Weeks DP, Bailey CP** (2008) The small ubiquitin-like modifier (SUMO) and SUMO-conjugating system of *Chlamydomonas reinhardtii*. *Genetics* **179**: 177-192
- <sup>11</sup>**Scheffner M, Huibregtse JM, Howley PM** (1994) Identification of a human ubiquitin conjugating enzyme that mediates the E6-AP-dependent ubiquitination of p53. *Proc Natl Acad Sci USA* **91**:8797-8801
- <sup>12</sup>**Seufert W, Jentsch S** (1990) Ubiquitin-conjugating enzymes UBC4 and UBC5 mediate selective degradation of short-lived and abnormal proteins. *EMBO J* **9**:543-550
- <sup>13</sup>**Kraft E, Stone SL, Ma L, Su N, Gao Y, Lau O-S, Deng X-W, Callis J** (2005) Genome analysis and functional characterization of the E2 and RING-Type E3 ligase ubiquitination enzymes of *Arabidopsis*. *Plant Physiol* **139**: 1597-1611
- <sup>14</sup>**Matuschewski K, Hauser HP, Treier M, Jentsch S** (1996) Identification of ubiquitin conjugating enzymes with distinct amino-terminal extensions. *J Biol Chem* **271**:2789-2794
- <sup>15</sup>**Nuber U, Schwarz S, Kaiser P, Schneider R, Scheffner M** (1996) Cloning of Human Ubiquitin-conjugating Enzymes UbcH6 and UbcH7 (E2-F1) and Characterization of their Interaction with E6-AP and RSP5 *J Biol Chem* **271**:2795-2800
- <sup>16</sup>**Ito K, Kato S, Matsuda Y, Kimura M, Okana Y** (1999) cDNA cloning, characterization, and chromosome mapping of UBE2E3 (alias UbcH9) encoding an N-terminally extended human ubiquitin-conjugating enzyme. *Cytogenet Cell Genet* **84**:99-104
- <sup>17</sup>**Kimura M, Hattori T, Matsuda Y, Yoshioka T, Sumi N, Umeda Y, Nakashima S, Okano Y** (1997) cDNA cloning, characterization, and chromosome mapping of UBE2E2 encoding a human ubiquitin-conjugating E2 enzyme. *Cytogenet Cell Genet* **78**:107-111



- <sup>18</sup>**Taka R, Matsuda N, Nakano A, Hasegawa K, Akimoto C, Shibuya N, Minami E** (2002) EL5, a rice N-acetylchitooligosaccharide elicitor-responsive RING-H2 finger protein, is a ubiquitin ligase which functions in vitro in co-operation with an elicitor-responsive ubiquitin-conjugating enzyme, OsUB5b. *Plant J* **30**:447-455
- <sup>19</sup>**Yanagawa Y, Sullivan JA, Komatsu S, Gusmaroli G, Suzuki G, Yin J, Ishibashi T, Saijo Y, Rubio V, Kimura S, Wang J, Deng XW** (2004) *Arabidopsis* COP10 forms a complex with DDB1 and DET1 in vivo and enhances the activity of ubiquitin conjugating enzymes *Genes Dev* **18**:2172-2181
- <sup>20</sup>**Girod PA, Carpenter TB, van Nocker S, Sullivan ML, Vierstra RD** (1993) Homologs of the essential ubiquitin conjugating enzymes UBC1, 4, and 5 in yeast are encoded by a multigene family in *Arabidopsis thaliana*. *Plant J* **3**:545-552
- <sup>21</sup>**Girod PA, Vierstra RD** (1993) A major ubiquitin conjugation system in what germ extracts involves a 15-kDa ubiquitin-conjugating enzyme (E2) homologous to the yeast Ubc4/UBC5 gene products. *J Biol Chem* **268**:955-960
- <sup>22</sup>**Reynolds P, Weber S, Prakash L** (1985) RAD6 gene of *Saccharomyces cerevisiae* encodes a protein containing a tract of 13 consecutive aspartates. *Proc Natl Acad Sci USA* **82**:168-172
- <sup>23</sup>**Sarcevic B, Mawson A, Baker RT, Sutherland RL** (2002) Regulation of the ubiquitin conjugating enzyme hHR6A by CDK-mediated phosphorylation. *EMBO J* **21**:2009-2018
- <sup>24</sup>**Townsley FM, Aristarkhov A, Beck S, Hershko A, Ruderman JV** (1997) Dominant-negative cyclin-selective ubiquitin carrier protein E2-C/UbcH10 blocks cells in metaphase. *Proc Natl Acad Sci USA* **94**: 2362-2367
- <sup>25</sup>**Yamakazi RK and Chau VC** (1996) Bacterial expression of the *Saccharomyces cerevisiae* Ubiquitin conjugating Enzyme Ubc7. *Protein Expr Purif* **7**:122-127
